# Supplementary material
Source: PubMed Central journal article supplement (PMC6510991)
Supplement: pnas.1819745116.sapp.pdf [file pnas.1819745116.sapp.pdf]

1 **SI Appendix**

2

3 **Exploratory trial of a biepitopic CAR-T–targeting B cell maturation antigen in**  
4 **relapsed/refractory multiple myeloma**

5

6 Jie Xu, Li-Juan Chen, Shuang-Shuang Yang, Yan Sun, Wen Wu, Yuan-Fang Liu, Ji Xu,  
7 Yan Zhuang, Wu Zhang, Xiang-Qin Weng, Jing Wu, Yan Wang, Jin Wang, Hua Yan,  
8 Wen-Bin Xu, Hua Jiang, Juan Du, Xiao-Yi Ding, Biao Li, Jun-Min Li, Wei-Jun Fu,  
9 Jiang Zhu, Li Zhu, Zhu Chen, Xiao-Hu (Frank) Fan, Jian Hou, Jian-Yong Li,  
10 Jian-Qing Mi, Sai-Juan Chen

11

12

13

14 **Inclusion Criteria**

15 Each potential subject must satisfy all of the following criteria to be enrolled in the  
16 study:

17 1. Subjects 18~75 years of age.

18 2. Documented initial diagnosis of multiple myeloma according to IMWG diagnostic  
19 criteria.

20 3. Measurable disease at Screening as defined by any of the following:

21 Serum monoclonal paraprotein (M-protein) level  $\geq 1.0$  g/dL or urine M-protein  
22 level  $\geq 200$  mg/24 hours; or light chain multiple myeloma without measurable disease  
23 in the serum or the urine: Serum immunoglobulin free light chain  $\geq 10$  mg/dL and  
24 abnormal serum immunoglobulin kappa/lambda free light chain ratio.

25 4. Received at least 3 prior lines of treatment for multiple myeloma.

26 Undergone at least 1 complete cycle of treatment for each line, unless PD was  
27 documented by IMWG criteria as the best response to the regimen.

28 5. Received a PI and/or an IMiD.

29 6. Documented disease progression during, or within 12 months of, most recent  
30 anti-myeloma therapy.

31 7. ECOG Performance Status grade of 0 ~ 2.

32 8. Clinical laboratory values meeting the following criteria during the Screening  
33 Phase:

34 Hemoglobin  $\geq 6.0$  g/dL (without prior red blood cell [RBC] transfusion within 7 days  
35 before the laboratory test; recombinant human erythropoietin use is permitted).

36 Platelets  $\geq 50 \times 10^9$ /L (must be without transfusion support in the 7 days prior to the  
37 laboratory test).

38 Absolute Neutrophil Count (ANC)  $\geq 2.0 \times 10^9$ /L (prior growth factor support is  
39 permitted).

40 AST and ALT  $\leq 2.5 \times$  upper limit of normal (ULN).

41 Creatinine clearance  $\geq 30$  mL/min/1.73 m<sup>2</sup> based upon Modified Diet in Renal Disease  
42 formula calculation or a 24-hour urine collection.

43 Total bilirubin  $\leq 1.5 \times$  ULN; except in subjects with congenital bilirubinemia, such as  
44 Gilbert syndrome (in which case direct bilirubin  $\leq 1.5 \times$  ULN is required).

45 Corrected serum calcium  $\leq 14.0$  mg/dL ( $\leq 3.5$  mmol/L) or free ionized calcium  $\leq 6.5$   
46 mg/dl ( $\leq 1.6$  mmol/L).

47 9. Women of childbearing potential must have a negative pregnancy test at screening  
48 and prior to the first dose of cyclophosphamide with or without fludarabine using a  
49 highly sensitive serum pregnancy test ( $\beta$  human chorionic gonadotropin).

50 10. When a woman is of childbearing potential the following are required:

51 Subject must agree to practice a highly effective method of contraception (failure  
52 rate of  $< 1\%$  per year when used consistently and correctly) and agree to remain on a  
53 highly effective method of contraception from the time of signing the informed  
54 consent form (ICF) until at least 100 days after receiving a LCAR-B38M CAR-T cell  
55 infusion.

56 11. Subject must sign an ICF indicating that he or she understands the purpose of and  
57 procedures required for the study and is willing to participate in the study. Consent is  
58 to be obtained prior to the initiation of any study-related tests or procedures that are  
59 not part of standard-of-care for the subject's disease.

60 12. Willing and able to adhere to the prohibitions and restrictions specified in this  
61 protocol.

62

63 **Exclusion Criteria**

64 Any potential subject who meets any of the following criteria will be excluded from  
65 participating in the study:

66 1. The following cardiac conditions:

67 New York Heart Association (NYHA) stage III or IV congestive heart failure

68 Myocardial infarction or coronary artery bypass graft (CABG)  $\leq 6$  months prior to  
69 enrollment

70 History of clinically significant ventricular arrhythmia or unexplained syncope, not  
71 believed to be vasovagal in nature or due to dehydration

72 History of severe non-ischemic cardiomyopathy

73 Impaired cardiac function (LVEF  $< 45\%$ ) as assessed by echocardiogram or  
74 multiple-gated acquisition (MUGA) scan (performed  $\leq 8$  weeks of apheresis)

75 2. Systemic corticosteroid therapy of greater than 5 mg/day of prednisone (or  
76 equivalent dose of another corticosteroid) within 2 weeks prior to apheresis

77 3. Received either of the following:

78 An allogeneic stem cell transplant for multiple myeloma

79 An autologous stem cell transplant  $\leq 12$  weeks before apheresis

80 4. Seropositive for human immunodeficiency virus (HIV)

81 5. Hepatitis B infection as defined according to the American Society of Clinical  
82 Oncology (ASCO) guidelines. In the event the infection status is unclear, quantitative  
83 levels are necessary to determine the infection status.

84 6. Hepatitis C (anti-hepatitis C virus [HCV] antibody positive or HCV-RNA  
85 quantitation positive) or known to have a history of hepatitis C.

86 7. Serious underlying medical condition, such as:

87 Evidence of serious active viral, bacterial, or uncontrolled systemic fungal  
88 infection

89 Active autoimmune disease or a history of autoimmune disease within 3 years

90 Overt clinical evidence of dementia or altered mental status

91 8. Known life threatening allergies, hypersensitivity, or intolerance to LCAR-B38M

92 CAR-T cells or its excipients, including DMSO (refer to Investigator's Brochure)  
93 9. Pregnant or breast-feeding, or planning to become pregnant while enrolled in this  
94 study or within 100 days after receiving study treatment.  
95 10. Any uncontrolled diseases, other than multiple myeloma, that may lead to  
96 abnormal death.  
97 11. Other cases excluded by the Investigators.

98  
99  
100

### 101 **Preparation of LCAR-B38M CAR-T cells**

102 Leukocytes were collected by apheresis, and then they were diluted with 0.9%  
103 NaCl solution. The diluted lymphocyte mix was layered on top of the lymphoprep  
104 medium (Fresenius Kabi, Oslo, Norway), and centrifuged at 800 g for 30 minutes at  
105 20 °C without brakes. Lymphocyte buffy coat was then collected with a 10 ml  
106 pipette. The harvested fraction was wash twice with 0.9% NaCl. 2ml of 37 °C  
107 pre-warmed TexMACS GMP Medium (Miltenyi Biotec, Teterow, Germany) with  
108 interleukin-2 (IL-2) (Jiangsu Kingsley Pharmaceutical.Co.,Ltd, Yixing, China) was  
109 added to the cell pellet, and re-suspended softly. Cell number was determined  
110 following Trypan Blue staining, and the PBMC was ready for T cell isolation.

111 T cells were collected using Miltenyi Pan T cell isolation kit (Miltenyi Biotec ,  
112 Teterow , Germany), following manufacturer's protocol as described and were either  
113 cultured fresh or cryopreserved and later thawed for culture. T cells were placed in  
114 TexMACS GMP Medium, supplied with IL-2, and incubated in a 37°C, 5% CO<sub>2</sub>  
115 humidified incubator. After pre-activation with CD3/CD28 beads (Miltenyi Biotec ,  
116 Teterow , Germany), the lentiviral vector containing LCAR-B38M was added and  
117 washed out on day 3 after culture initiation. Cells were expanded *ex vivo* for up to 11  
118 days under IL-2 stimulation before harvest and preparation for infusion. All infused T  
119 cell products were required to meet predefined release criteria, including: cell viability

120  $\geq 70\%$ , CD3<sup>+</sup> cells  $\geq 80\%$ , endotoxin  $\leq 3.5$  EU/mL, mycoplasma negative, bacterial and  
121 fungal cultures negative, transduction efficiency by flow cytometry  $\geq 5\%$ .

122 The CAR-T cells were frozen during storage and transportation. They were put in  
123 37°C water bath until a suspended state is reached before infusion. Once thawed, the  
124 administration of cell delivery should be completed in 5 minutes.

125

126

127

### 128 **Treatment administration**

129 Approximately 4 weeks after apheresis, and after the site was notified in writing by  
130 the Legend team that manufacture of LCAR-B38M CAR-T cells had been completed,  
131 each subject would receive a conditioning regimen of cyclophosphamide 250 mg/m<sup>2</sup>  
132 intravenously (IV) daily and fludarabine 25 mg/m<sup>2</sup> IV daily for 3 days, or  
133 cyclophosphamide 300 mg/m<sup>2</sup> IV daily for 3 days. LCAR-B38M CAR-T cells will be  
134 administered 5 days after the start of the conditioning regimen (the first day of  
135 conditioning is Day -5 to Day -3, and the starting day of LCAR-B38M CAR-T cell  
136 infusion is Day 0). If administration of cyclophosphamide with or without fludarabine  
137 must be delayed  $\geq 10$  weeks after apheresis, the subject must undergo full rescreening  
138 prior to dosing. Cyclophosphamide  $\pm$  fludarabine should be administered using  
139 administration procedures and supportive care according to the site's standard of care.

140 LCAR-B38M CAR-T cells were administered as summarized in the following table.  
141 The administration method includes one-time infusion and three-time infusion.  
142 Subjects should remain in the hospital for at least 2 weeks after infusion of  
143 LCAR-B38M CAR-T cells and would be discharged from the hospital per assessment  
144 of the subject's condition by the Investigator.

145

146

147

148

149

|                                                        |                                                                                                                                                                                                                                                                                                                                                                                                                                                                                                                                                                                                                                  |
|--------------------------------------------------------|----------------------------------------------------------------------------------------------------------------------------------------------------------------------------------------------------------------------------------------------------------------------------------------------------------------------------------------------------------------------------------------------------------------------------------------------------------------------------------------------------------------------------------------------------------------------------------------------------------------------------------|
| <b>Dose</b>                                            | The dose was 0.2-2.0×10 <sup>6</sup> CAR-positive viable T-cells/kg. The maximum total dose of cells to be administered to any subject was 1.0 × 10 <sup>8</sup> CAR-positive viable T-cells. The dose and administration schedule might be altered for safety purposes based on emerging data. If after apheresis and CAR-T cell preparation the quantity of LCAR-B38M CAR-T cells manufactured was not sufficient for dosing at the lower end of the dosing range, dosing for that subject may proceed, provided that a measurable quantity of LCAR-B38M CAR-positive viable T cells that pass quality testing were generated. |
| <b>Route/Regimen</b>                                   | LCAR-B38M CAR-T cells IV infusion was to be administered under the supervision of site staff.                                                                                                                                                                                                                                                                                                                                                                                                                                                                                                                                    |
| <b>Dosing instructions</b>                             | The actual dose for study treatment administration was based on the subject's weight (kg) at apheresis.                                                                                                                                                                                                                                                                                                                                                                                                                                                                                                                          |
| <b>Schedule of administration</b>                      | Ruijin Hospital affiliated to Shanghai Jiao Tong University School of Medicine (RJ), and Changzheng Hospital affiliated to Shanghai Second Military Medical University (CZ) used a split infusion method that a total dose of CAR-T cells was administered at day 0, day 2 and day 6 by split infusions (20%, 30% and 50% respectively). First Affiliated Hospital of Nanjing Medical University (JS) used single intravenous infusion of CAR-T cells.                                                                                                                                                                           |
| <b>Hospitalization recommendations after discharge</b> | Subjects who experience a fever or an event of neurotoxicity after discharge from the hospital should be evaluated by the Investigator. Subjects might be re-hospitalized at the discretion of the Investigator. In case of urgency, subjects should go to the local hospital and the treating physician should contact Investigator.                                                                                                                                                                                                                                                                                            |
| <b>Vital sign and clinical safety monitoring</b>       | On the day of infusion, blood routine, hepatic and renal functions, should be tested. Investigators examined the vital signs including temperature, blood pressure, heart rate and respiratory rate to make sure all were in normal prior to cell delivery. Vital signs and oxygen saturation should be monitored three times a day for at least two weeks post infusion.                                                                                                                                                                                                                                                        |

150

151

152

153

154

155 **Detection of CAR-T cells by fluorescence-activated cell sorter (FACS) and**  
156 **quantitative real-time polymerase chain reaction (qPCR)**

157 Fresh PBMCs were suspended in FACS buffer (PBS containing 1% FBS, with or  
158 without 0.1% Na<sub>3</sub>N) and stained with anti-human CD3 and FITC-labeled human  
159 BCMA protein (ACRO Biosystems). FACS data were collected using an LSRII flow  
160 cytometer (Becton Dickinson, Franklin Lakes, NJ, USA) and were analyzed with  
161 FlowJo software (TreeStar, Ashland, OR, USA).

162 For qPCR, genomic DNA was isolated from samples of whole blood obtained at  
163 serial time points before and after infusion of LCAR-B38M using ABI Taqman  
164 technology (Item 7500, Thermofisher, Singapore). A clonal cell line with known copy  
165 number of CAR was generated to produce standard curve. All samples were measured  
166 three times with a positive Ct value in 3/3 replicates with %CV less than 2%. A  
167 parallel amplification reaction was performed for apoB gene using 20ng genomic  
168 DNA to control the quality of interrogated DNA. Copies of transgene per microgram  
169 DNA were calculated from BCMA standard curve  $\times$  correction factor/amount DNA  
170 evaluated (ng)  $\times$  1000ng.

171

172

173

**Supplementary Table 1. BCMA epitope peptide sequence**

| <b>Code</b> | <b>Position</b> | <b>Amino acid residue sequence</b> | <b>Length</b> |
|-------------|-----------------|------------------------------------|---------------|
| 269EP001    | 1-10            | MLQMAGQCSQ                         | 10            |
| 269EP002    | 8-21            | CSQNEYFDSLHAC                      | 14            |
| 269EP003    | 11-23           | NEYFDSLHACIP                       | 13            |
| 269EP004    | 20-30           | ACIPCQLRCSS                        | 11            |
| 269EP005    | 24-42           | <u>CQLRCSSNTPPLTCQRYCN</u>         | 19            |
| 269EP006    | 36-43           | <u>LTCQRYCNAS</u>                  | 10            |
| 269EP007    | 43-54           | ASVTNSVK GTNA                      | 12            |

**Supplementary Table 2. Information of CAR<sup>+</sup> T cells in product, conditioning therapy and method of infusion**

| <b>ID</b> | <b>Fraction of CAR<sup>+</sup> T cells (%)</b> | <b>CD4<sup>+</sup> CAR<sup>+</sup> T cells (%)</b> | <b>CD8<sup>+</sup> CAR<sup>+</sup> T cells (%)</b> | <b>Conditioning therapy*</b> | <b>Method of infusion†</b> |
|-----------|------------------------------------------------|----------------------------------------------------|----------------------------------------------------|------------------------------|----------------------------|
| RJ01      | 58.5                                           | 38.9                                               | 61.1                                               | FC                           | three-infusion             |
| RJ02      | 35.0                                           | 62.5                                               | 37.5                                               | FC                           | three-infusion             |
| RJ03      | 35.0                                           | 64.3                                               | 35.7                                               | FC                           | three-infusion             |
| RJ04      | 14.5                                           | 30.59                                              | 69.4                                               | FC                           | three-infusion             |
| RJ05      | 42.6                                           | 17.1                                               | 82.9                                               | FC                           | three-infusion             |
| JS01      | 22.4                                           | 27.6                                               | 72.4                                               | C                            | one-infusion               |
| JS02      | 9.4                                            | 42.7                                               | 57.3                                               | C                            | one-infusion               |
| JS03      | 49.0                                           | 47.1                                               | 52.9                                               | C                            | one-infusion               |
| JS04      | 23.0                                           | 41.9                                               | 58.1                                               | C                            | one-infusion               |
| JS05      | 11.5                                           | 61.2                                               | 38.8                                               | C                            | one-infusion               |
| JS06      | 22.2                                           | 39.0                                               | 61.1                                               | C                            | one-infusion               |
| JS07      | 51.1                                           | 10.3                                               | 89.7                                               | C                            | one-infusion               |
| JS08      | 75.9                                           | 45.7                                               | 54.3                                               | C                            | one-infusion               |
| JS09      | 21.0                                           | 30.1                                               | 69.9                                               | C                            | one-infusion               |
| CZ01      | 11.5                                           | 40.3                                               | 59.7                                               | FC                           | three-infusion             |
| CZ02      | 22.9                                           | 25.3                                               | 74.7                                               | FC                           | three-infusion             |
| CZ03      | 12.3                                           | 31.4                                               | 68.7                                               | FC                           | three-infusion             |

**Note:** \* FC: Cyclophosphamide 250 mg/m<sup>2</sup> and fludarabine 25 mg/m<sup>2</sup> intravenously daily for 3 days; C: Cyclophosphamide 300 mg/m<sup>2</sup> intravenously daily for 3 days. † Two different delivery methods were used: three-infusion given at day 0, day 3 and day 6 in 8 patients; one-infusion given at day 0 in 9 cases.



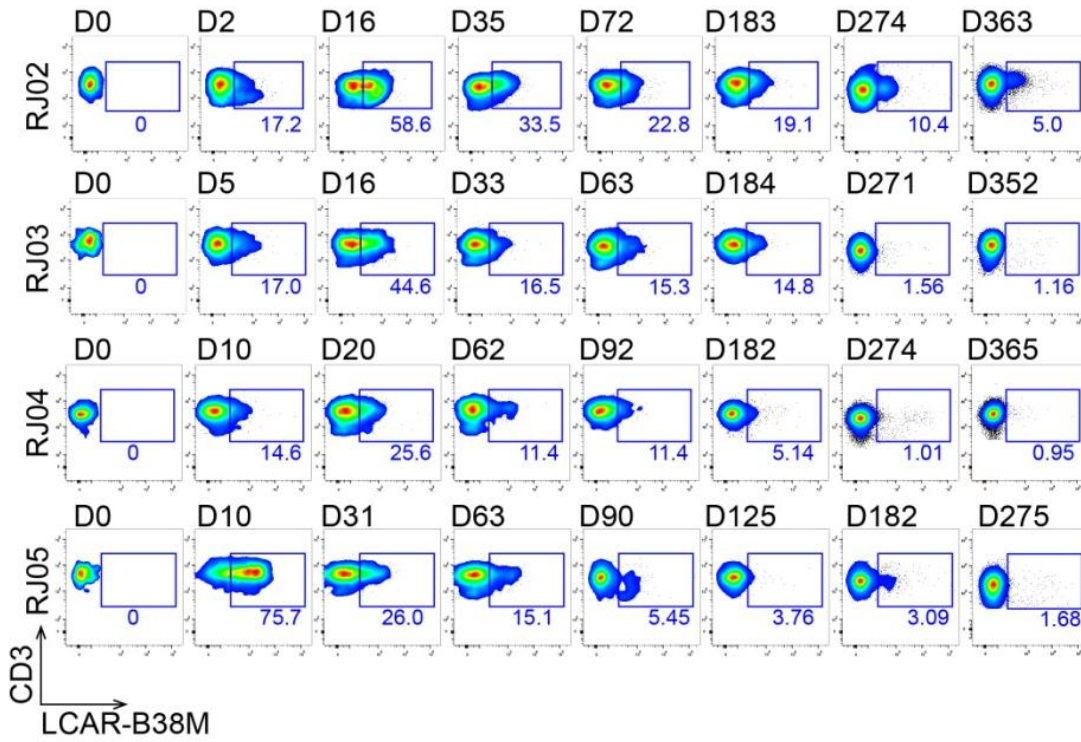

177

178 **Supplementary Figure 1. CAR-T cells in the peripheral blood of treated patients.**

179 Flow cytometry shows the percentage of BCMA specific CAR-T cells in CD3  
 180 positive peripheral T cells of patient RJ02, RJ03, RJ04 and RJ05. The time course is  
 181 indicated as days (D) after CAR-T infusion.

182

183

184

185

186

187

188

189

190

191

192

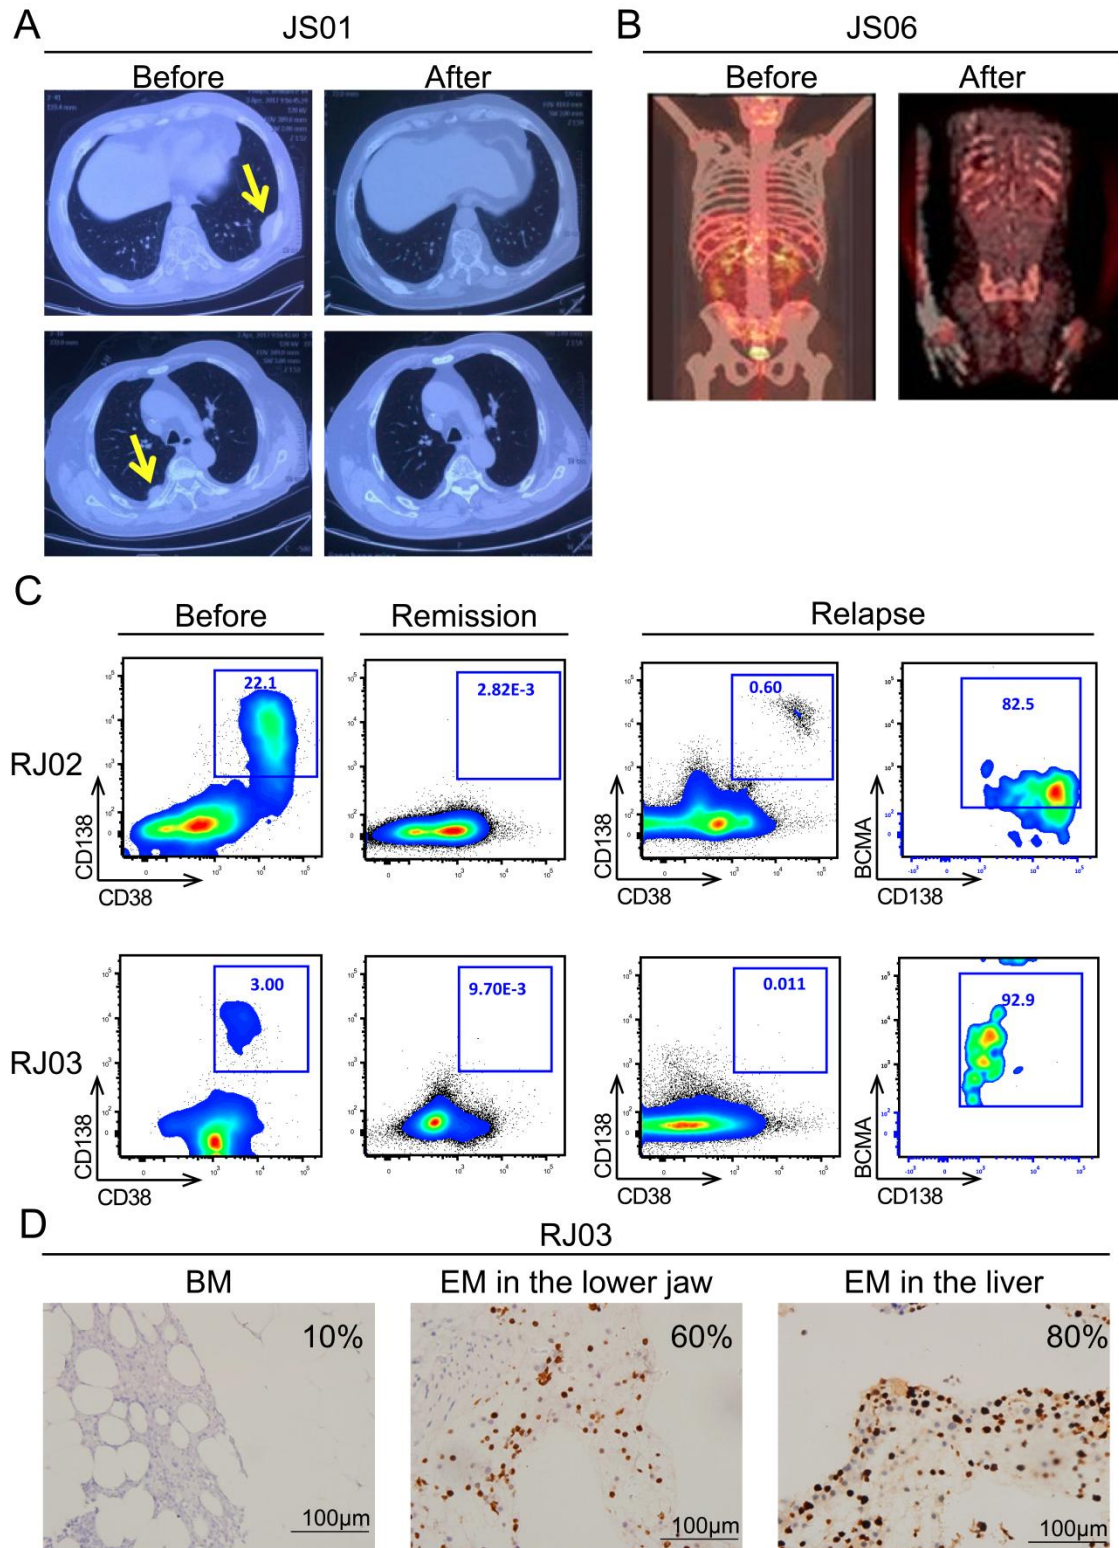

194

195 **Supplementary Figure 2. The intra- or extramedullary involvements in treated**  
 196 **patients.**

197 **(A)** Patient JS01 developed extramedullary mass in pleura two years after diagnosis.

198 Massive plasma cells were seen in fine needle aspiration of the chest mass. One  
199 month after CAR-T therapy, CT scan of the chest revealed disappearance of pleural  
200 mass. **(B)** Patient JS06 had tumor infiltration in the pleura and peritoneum. All  
201 infiltrated lesions disappeared at 6 months post CAR-T. **(C)** Flow cytometry detection  
202 shows bone marrow (BM) plasma cells (CD38<sup>+</sup>CD138<sup>+</sup>) in patient RJ02 and RJ03 at  
203 different stages including before CAR-T therapy, remission or relapse after CAR-T  
204 treatment. The plots with CD138<sup>+</sup>BCMA<sup>+</sup> indicate the plasma cells with expressed  
205 BCMA. **(D)** Ki-67 staining of BM and extramedullary (EM) tumor biopsies of patient  
206 RJ03 at initial CAR-T therapy.

207

208

209

210

211

212

213

214

215

216

217

218

219

220

221

222

223

224

225

226

227

228 **Figure S3**

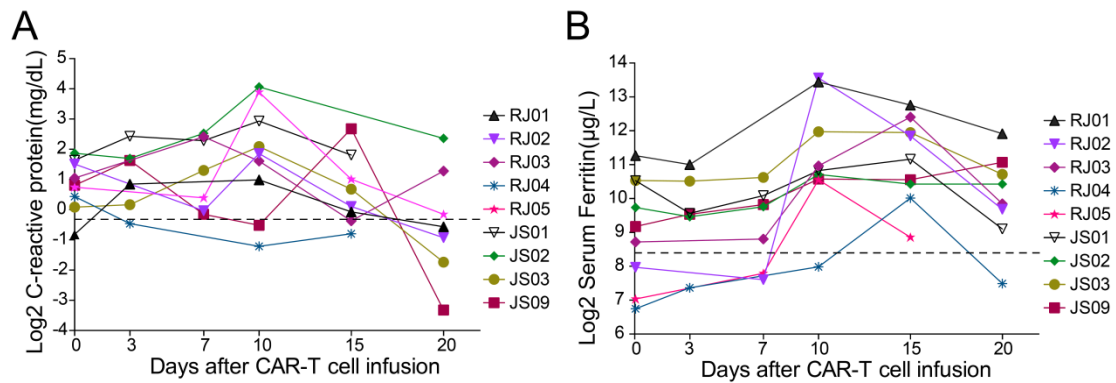

229

230

231 **Supplementary Figure 3. C-reactive protein (CRP), and ferritin levels in the**  
232 **serums of treated patients.**

233 (A) The plot presents the CRP levels after infusion of LCAR-B38M. The elevated  
234 CRP was accompanied with CRS. The dashed line represents the normal upper limit  
235 of CRP. (B) The chart displays the ferritin levels after infusion of LCAR-B38M. The  
236 elevated ferritin was accompanied with CRS. The dashed line represents the normal  
237 upper limit of ferritin.
